# Supplementary material for: An ionic liquid-based extraction system using diglycolamide functionalized macrocyclic platforms for the extraction and recovery of lanthanides
Source: Royal Society of Chemistry journal article supplement (doi:10.1039/c7dt02797d), 2017-01-01
Supplement: c7dt02797d1.pdf [file c7dt02797d1.pdf]

**Supporting information for:**

**Ionic liquid-based extraction system using diglycolamide functionalized macrocyclic platforms for the extraction and recovery of lanthanides**

M. Wehbie,<sup>a,b</sup> G. Arrachart,<sup>a,\*</sup> I. Karamé,<sup>b</sup> L. Ghannam,<sup>b</sup> and S. Pellet-Rostaing<sup>a,\*</sup>

<sup>a</sup>: ICSM-UMR 5257, CEA, CNRS, Univ. Montpellier, ENSCM, Bagnols-sur-Cèze, France  
[guilhem.arrachart@cea.fr](mailto:guilhem.arrachart@cea.fr) ; [stephane.pellet-rostaing@cea.fr](mailto:stephane.pellet-rostaing@cea.fr)

<sup>b</sup>: LCOM, Department of Chemistry, Lebanese University, Faculty of Sciences I, Hadath, Lebanon.

Table SI- 1 : Extraction data of each individual Ln (III) by CR4-TZ-DODGA and C4-TZ-DODGA at 25° C; [L]= 0.165-2.64 mM in EOip[NTf<sub>2</sub>]/ 10 % octanol; [Ln<sup>3+</sup>]=0.66Mm

|     | [Ligand] | D <sub>La</sub> | D <sub>Eu</sub> | D <sub>Yb</sub> |
|-----|----------|-----------------|-----------------|-----------------|
| LI  | 0.165    | 0.03            | 0.31            | 0.32            |
|     | 0.33     | 0.06            | 0.39            | 0.87            |
|     | 0.66     | 0.09            | 3.7             | 7.2             |
|     | 1.32     | 0.23            | 28              | 89              |
|     | 2.64     | 0.52            | 111             | 995             |
| LII | 0.165    | 0.08            | 0.32            | 0.33            |
|     | 0.33     | 0.17            | 0.87            | 0.98            |
|     | 0.66     | 0.37            | 4.6             | 14              |
|     | 1.32     | 0.72            | 30.5            | 447             |
|     | 2.64     | 1.28            | 187             | 2239            |

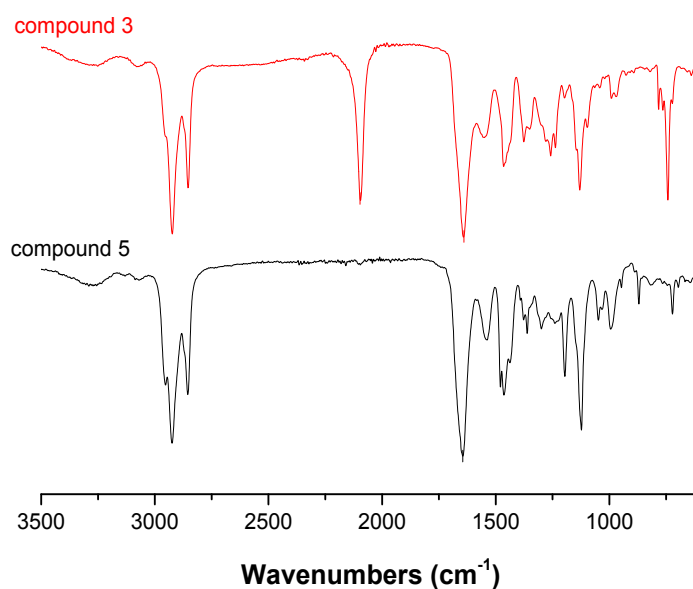

Figure SI-1: IR spectra of compound 3 and 5

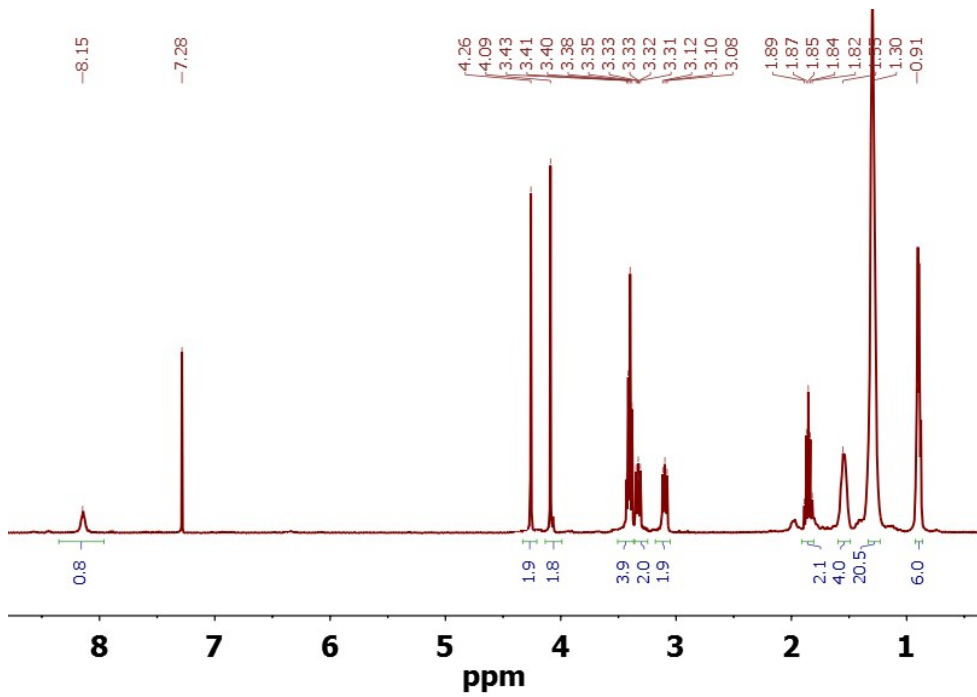

Figure SI- 2:  $^1\text{H}$  NMR of compound 3

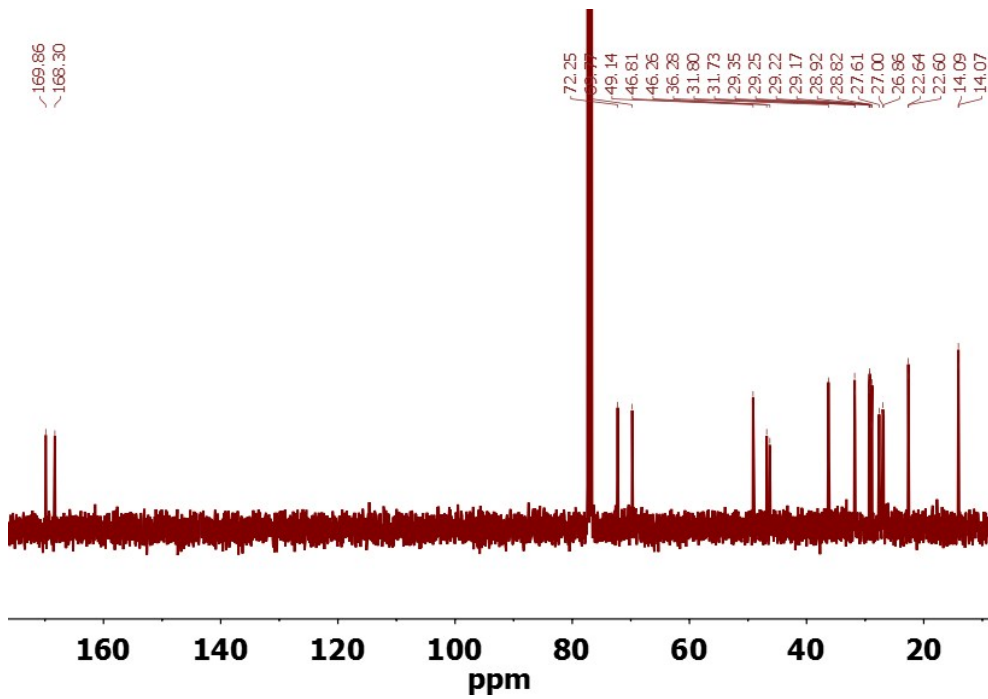

Figure SI- 3:  $^{13}\text{C}$  NMR of compound 3

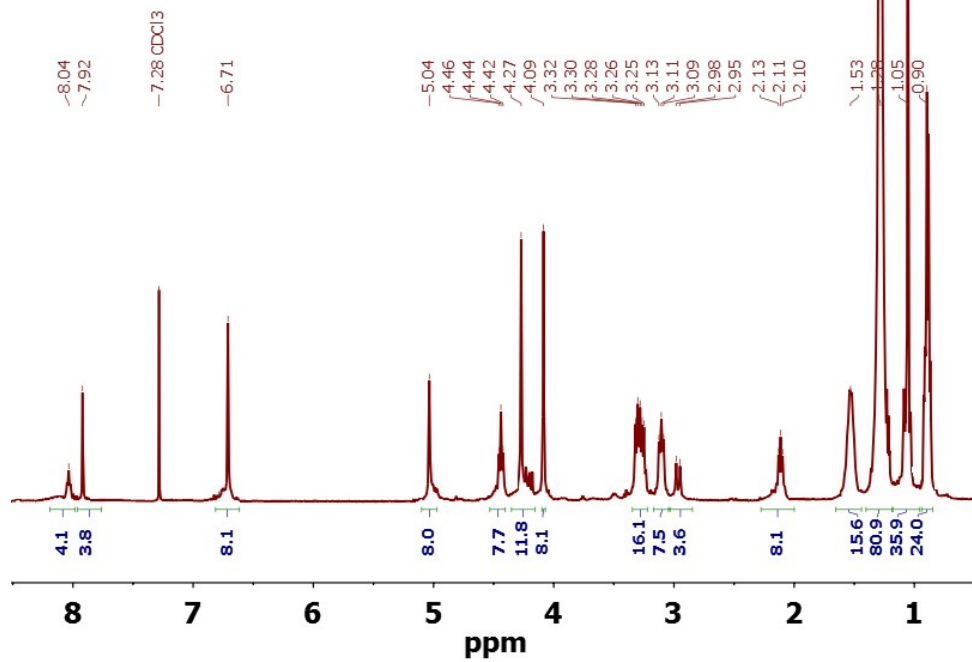

Figure SI- 4: <sup>1</sup>H NMR of compound 5 (LII)

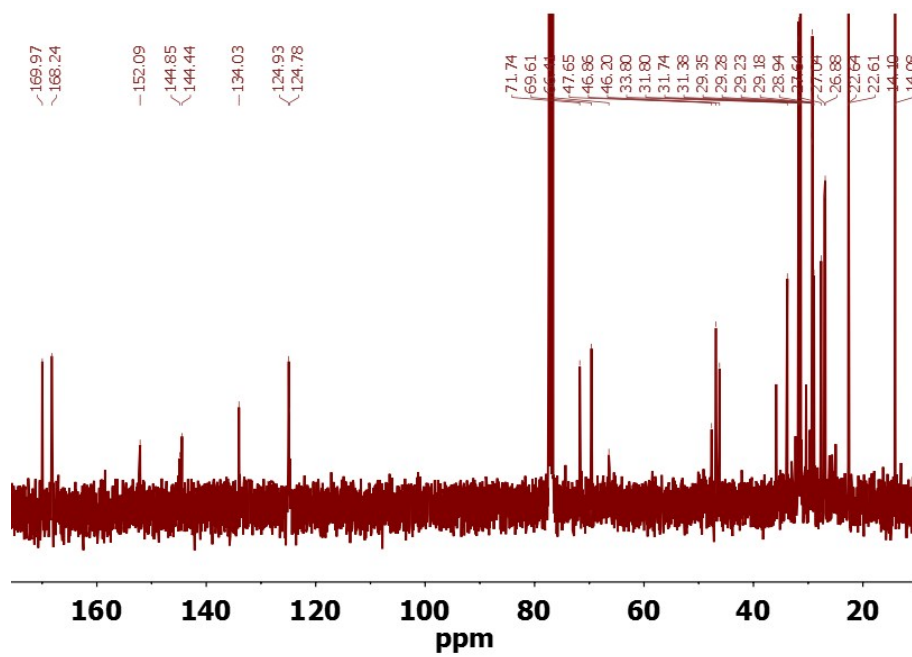

Figure SI- 5 : <sup>13</sup>C NMR of compound 5 (LII)

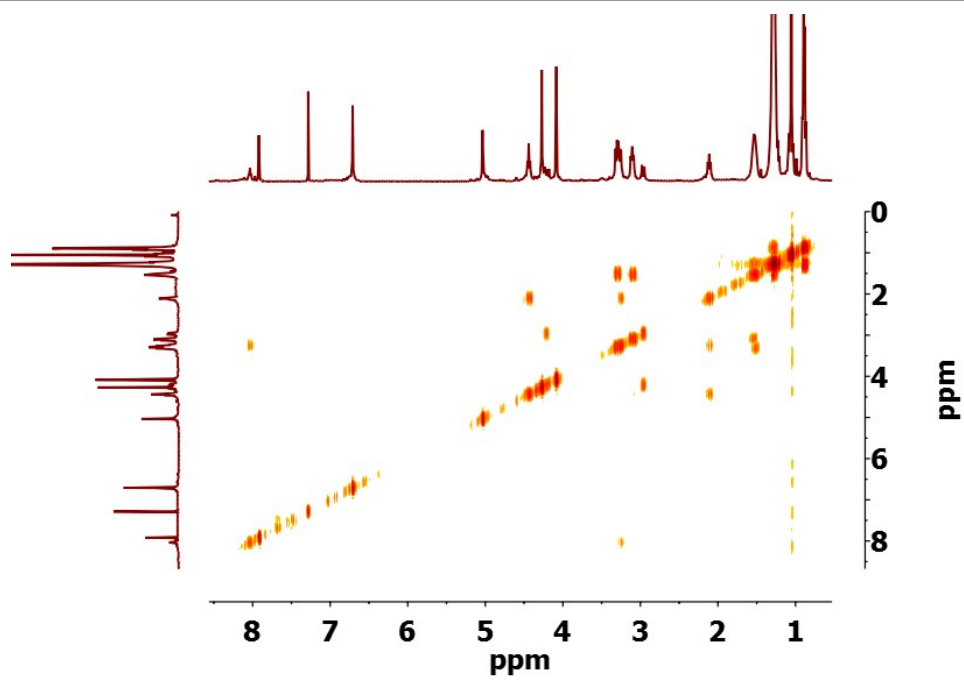

Figure SI- 6 : COSY spectrum of compound 5 (LII)
